# Supplementary material
Source: Springer Nature journal article supplement (https://www.springermedizin.de/resource/supplementary/12885_2011_2684_MOESM2_ESM.pdf/9461774)

**A**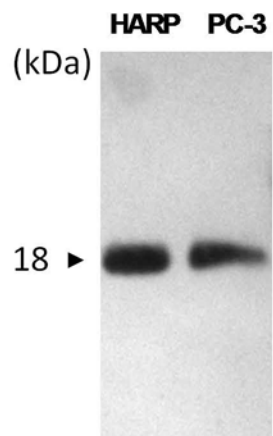**B**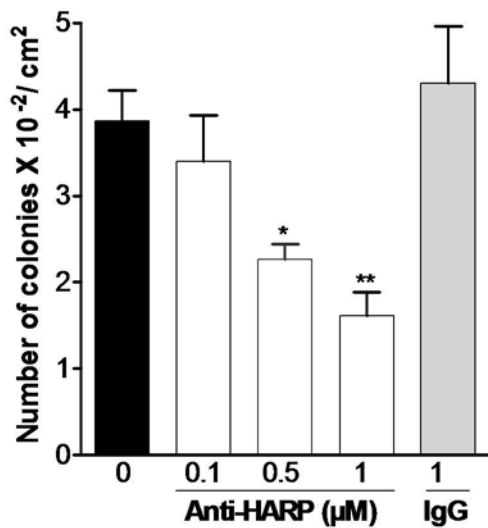**C**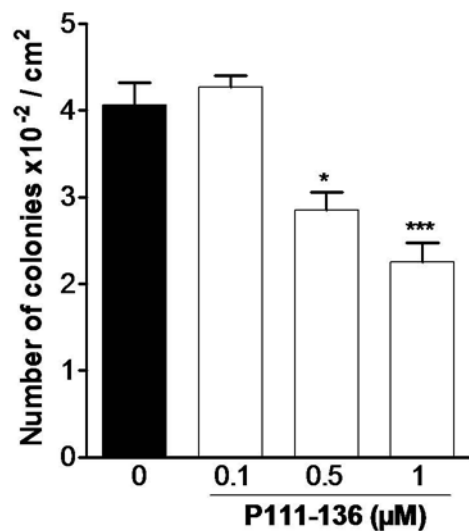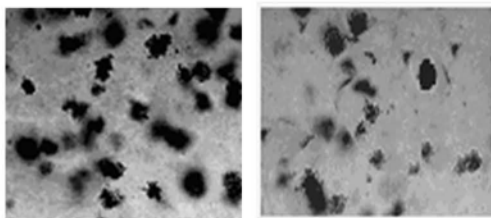

Control

Anti-HARP

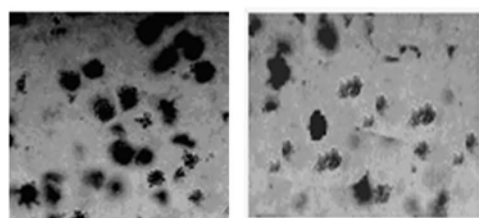

Control

P111-136

Supplement: MOESM2 [file 9461774]
